# Supplementary material for: Design and Evaluation of Novel Textile Wearable Systems for the Surveillance of Vital Signals
Source: Preprints.org preprint supplement (doi:10.20944/preprints201609.0079.v1), 2016-09-23
Supplement: Supplementary file 1 [file supplementary]

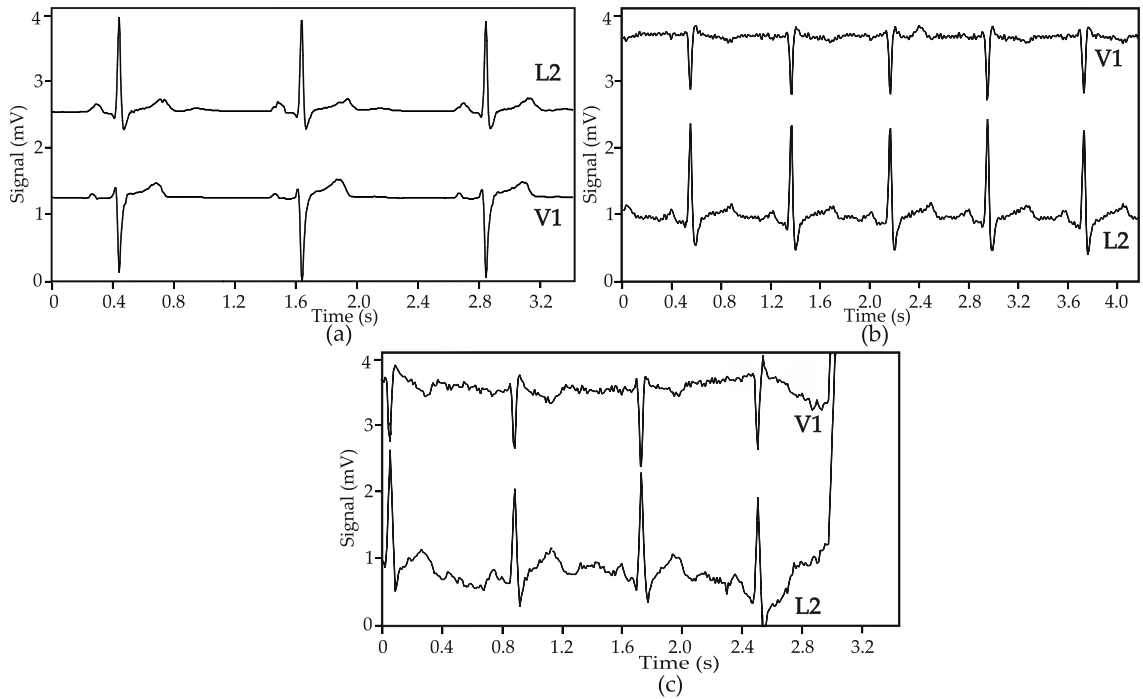

**Figure 11.** ECG signals obtained in ambulatory with holter monitoring device and patient ID = 1: **(a)** gel electrodes, rate 50 BPM; **(b)** textile electrodes, rate 74 BPM; **(c)** textile electrodes, rate 71 BPM, showing motion artifact interference leading to lost of signals .
